# Supplementary material for: Coacervation and precipitation in polysaccharide–protein systems
Source: Royal Society of Chemistry journal article supplement (doi:10.1039/c6sm00044d), 2016-01-01
Supplement: c6sm00044d2.pdf [file c6sm00044d2.pdf]

## Supporting Information

### Coacervation and Precipitation in Polysaccharide-protein Systems

*Fatih Comert<sup>†</sup>, Alexander J. Malanowski<sup>†</sup>, Mojgan Azarikia<sup>‡</sup>, and Paul L. Dubin<sup>†\*</sup>*

<sup>†</sup> Department of Chemistry, University of Massachusetts Amherst, 710 North Pleasant Street, Amherst, Massachusetts 01003, United States

<sup>‡</sup> Department of Food Science & Technology, Faculty of Agriculture, Tarbiat Modares University, P.O. Box 14115-336, Tehran, Iran

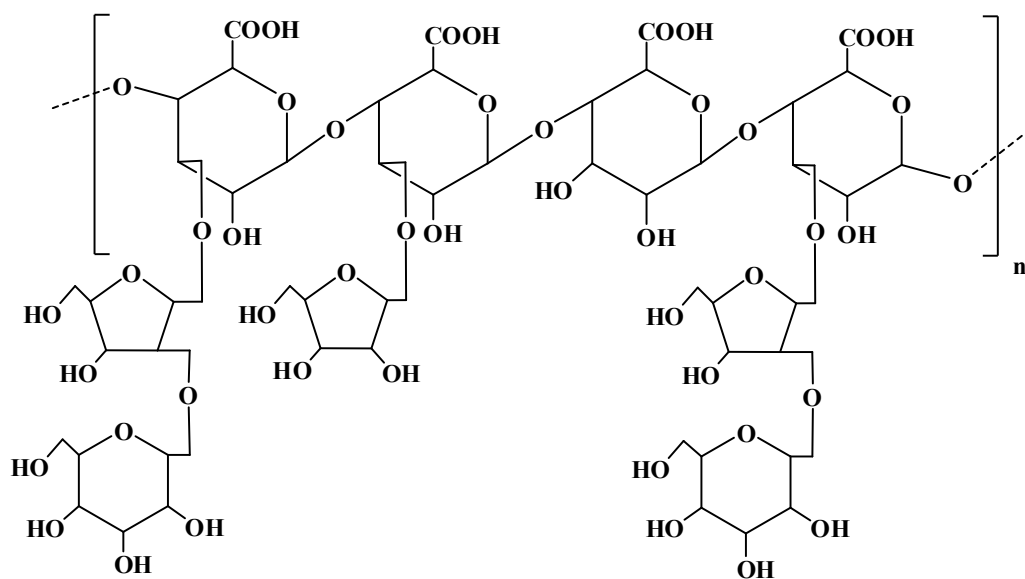

**Figure S1.** The chemical structure of tragacanthin (TG).

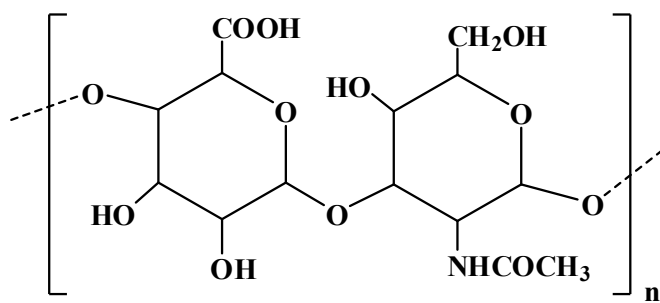

**Figure S2.** The chemical structure of hyaluronic acid (HA).

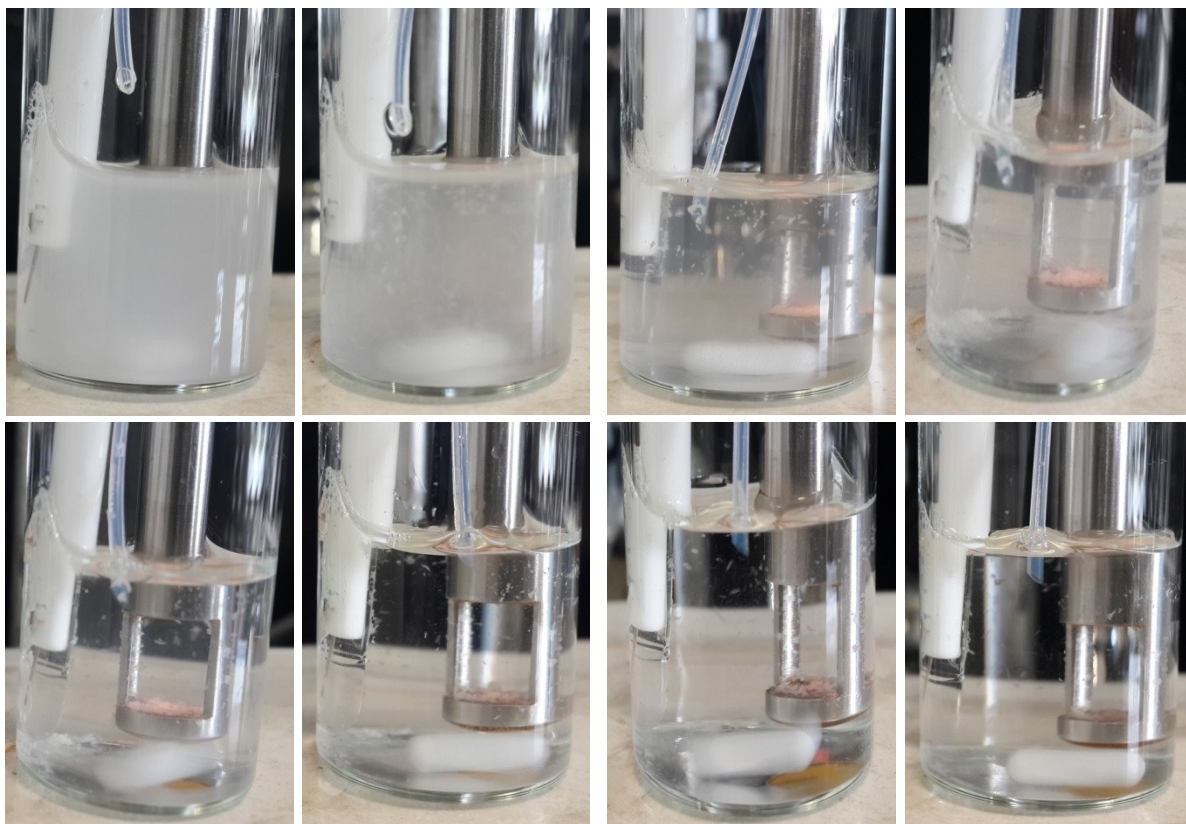

**Figure S3.** pH dependence of the turbidity and system state for HA(0.1 g/L) and BLG (1 g/L) mixture with respect to pH in 25 mM NaCl, upon addition of acid (forward titration). First row (left to right): pH 4.4, 4.25, 3.75, and 3.6. Second row (left to right): pH 3.3, 2.4, 2.2, and 2.0.

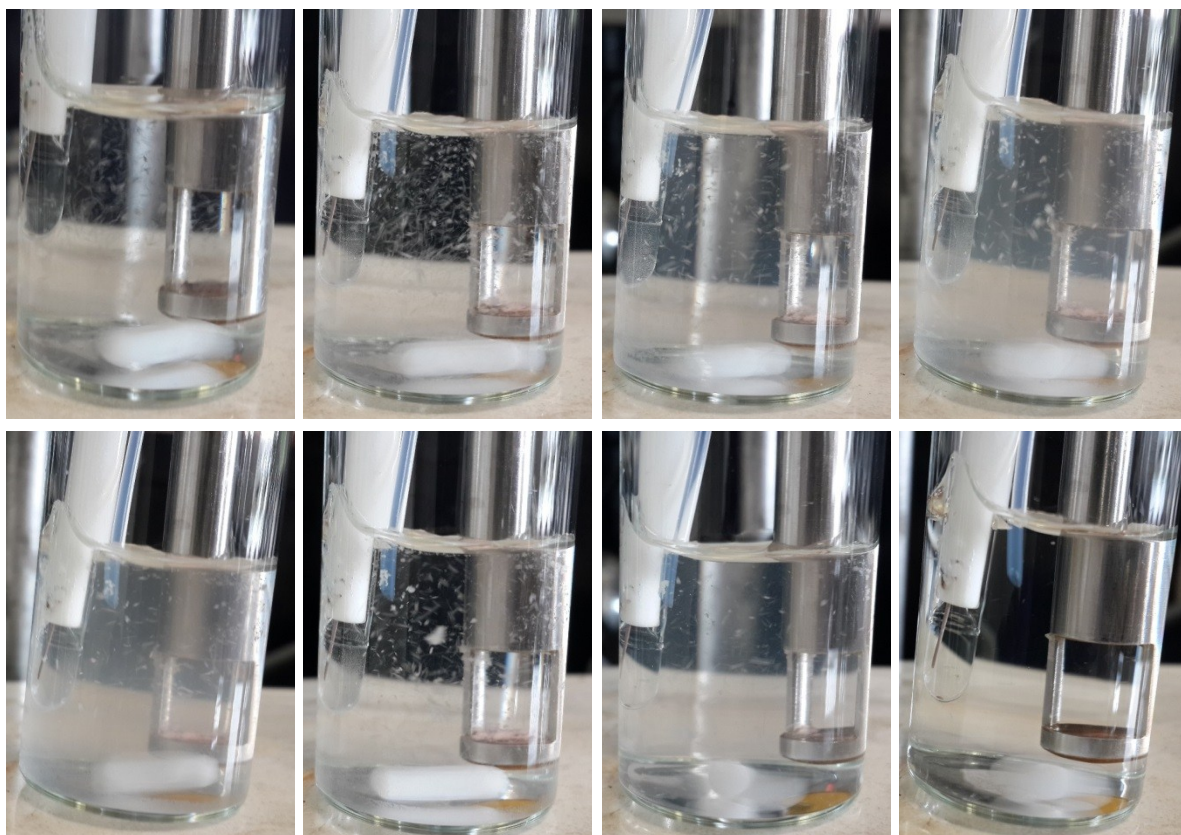

**Figure S4.** pH dependence of the turbidity and system state for HA(0.1 g/L) and BLG (1 g/L) mixture with respect to pH in 25 mM NaCl, upon addition of base (back titration). First row (left to right): pH 2.2, 2.7, 3.6, and 3.7. Second row (left to right): pH 4.2, 4.53, 5.1, and 7.0.

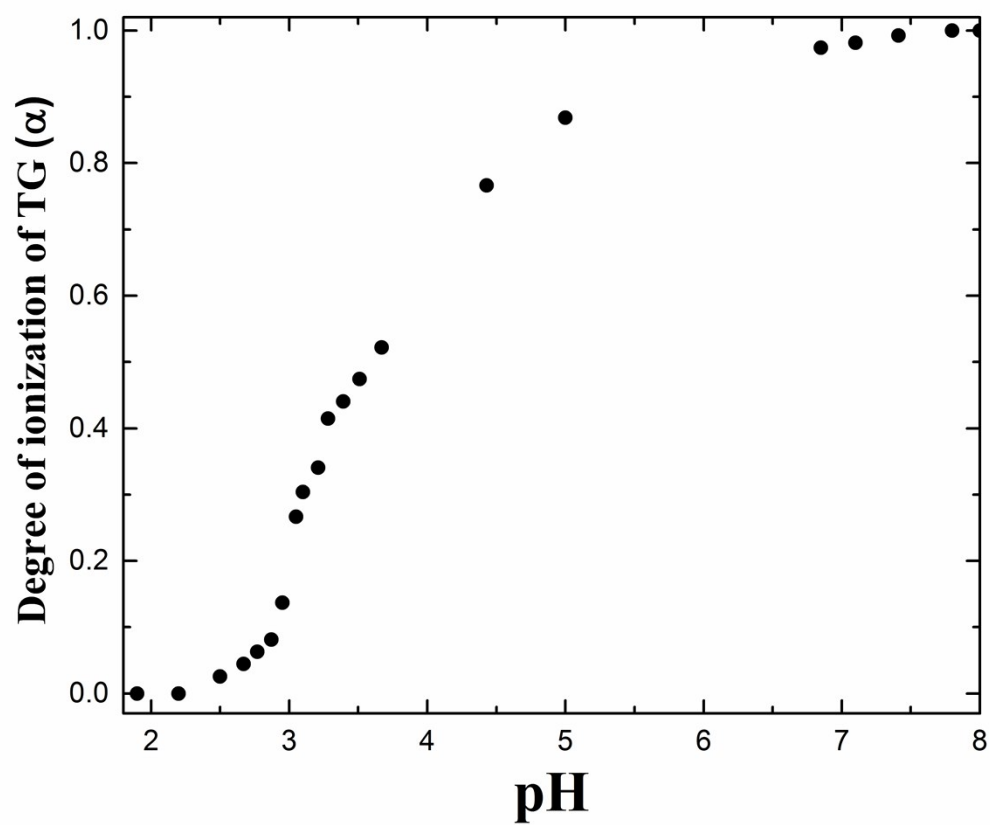

**Figure S5.** pH dependence of degree of ionization of TG in water ( $I \approx 0$ ). pH at  $\alpha = 0.5$  is defined as  $\text{pK}_a$ .
